# Supplementary material
Source: Springer Nature journal article supplement (https://www.springermedizin.de/resource/supplementary/12984_2010_245_MOESM1_ESM.pdf/9605608)

”Closed loop” in postural control

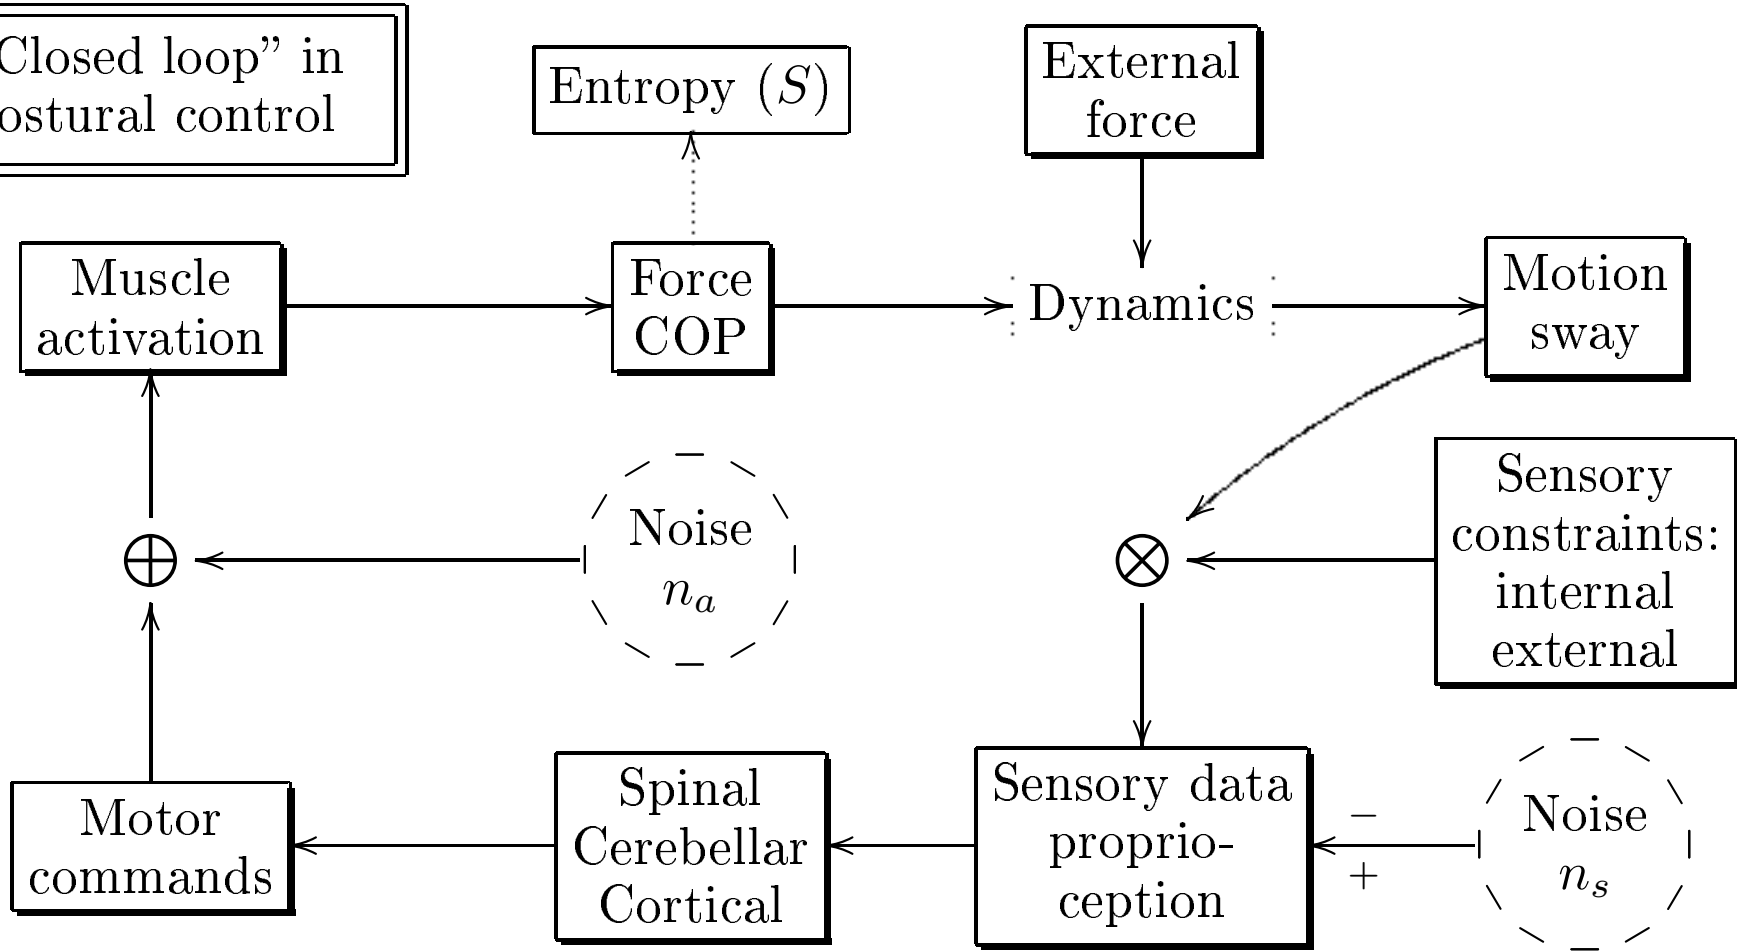

Supplement: MOESM1 [file 9605608]
